# Supplementary material for: Bioinorganic chemistry of copper and zinc ions coordinated to amyloid-β peptide
Source: Royal Society of Chemistry journal article supplement (doi:10.1039/b813398k), 2008-11-27
Supplement: b813398k.pdf [file b813398k.pdf]

## Supplementary Information:

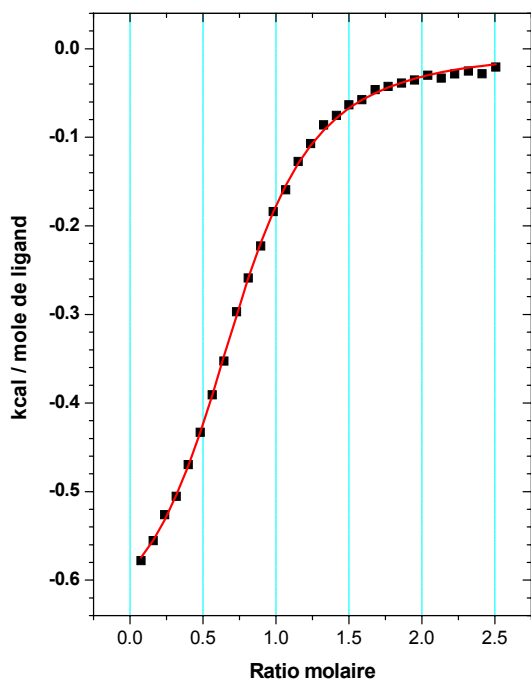

Figure S1. Isothermal Titration Calorimetry of Cu(A $\beta$ 16) in 50mM Tris buffer pH 7.4 100mM NaCl. Peptide concentration 80  $\mu$ M ; 1 mM CuCl<sub>2</sub> in the same buffer was added. The squares show the measurement and the red line the best fit, which revealed the following parameters: Stoichiometry 0.9;  $K_a = 1.28 \times 10^5$  M ( $^aK_d = 8 \mu$ M);  $\Delta H = - 3,222$  kcal.mol<sup>-1</sup>.
